# Supplementary material for: Similar progression of diabetic retinopathy with insulin glargine and neutral protamine Hagedorn (NPH) insulin in patients with type 2 diabetes: a long-term, randomised, open-label study
Source: Springer Nature journal article supplement (doi:10.1007/s00125-009-1415-7), 2009-06-12
Supplement: MOESM1 [file 8088500]

## Electronic supplementary material

**ESM Table 1** Summary of treatment-emergent adverse events (safety population)

| Event                                                                     | Insulin glargine<br>( <i>n</i> =514) | NPH insulin<br>( <i>n</i> =503) |
|---------------------------------------------------------------------------|--------------------------------------|---------------------------------|
| Any event                                                                 | 490 (95.3)                           | 479 (95.2)                      |
| Patients with any treatment-emergent serious adverse event                | 211 (41.1)                           | 215 (42.7)                      |
| Patients permanently discontinued due to treatment-emergent adverse event | 16 (3.1)                             | 11 (2.2)                        |
| Treatment-emergent adverse event leading to death                         | 14 (2.7)                             | 11 (2.2)                        |

Data are *n* (%)
