# Supplementary material for: Similar progression of diabetic retinopathy with insulin glargine and neutral protamine Hagedorn (NPH) insulin in patients with type 2 diabetes: a long-term, randomised, open-label study
Source: Springer Nature journal article supplement (doi:10.1007/s00125-009-1415-7), 2009-06-12
Supplement: MOESM3 [file 8088500]

**a**

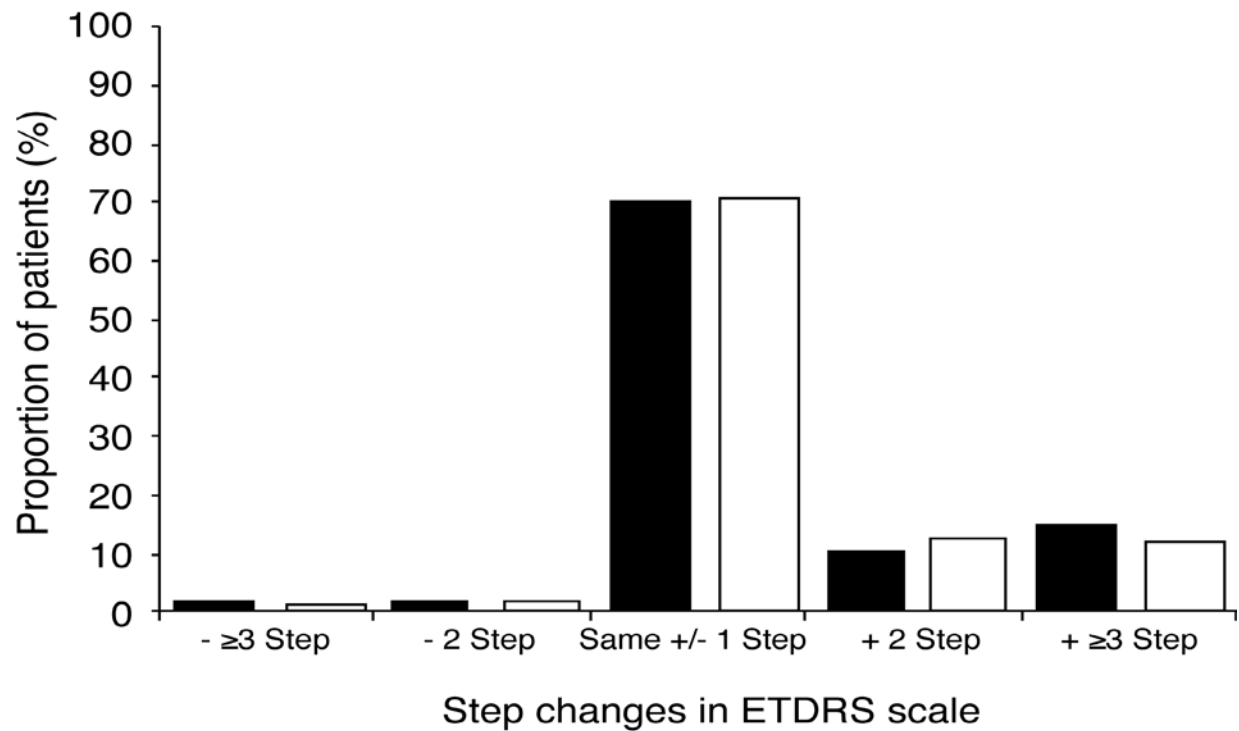

**b**

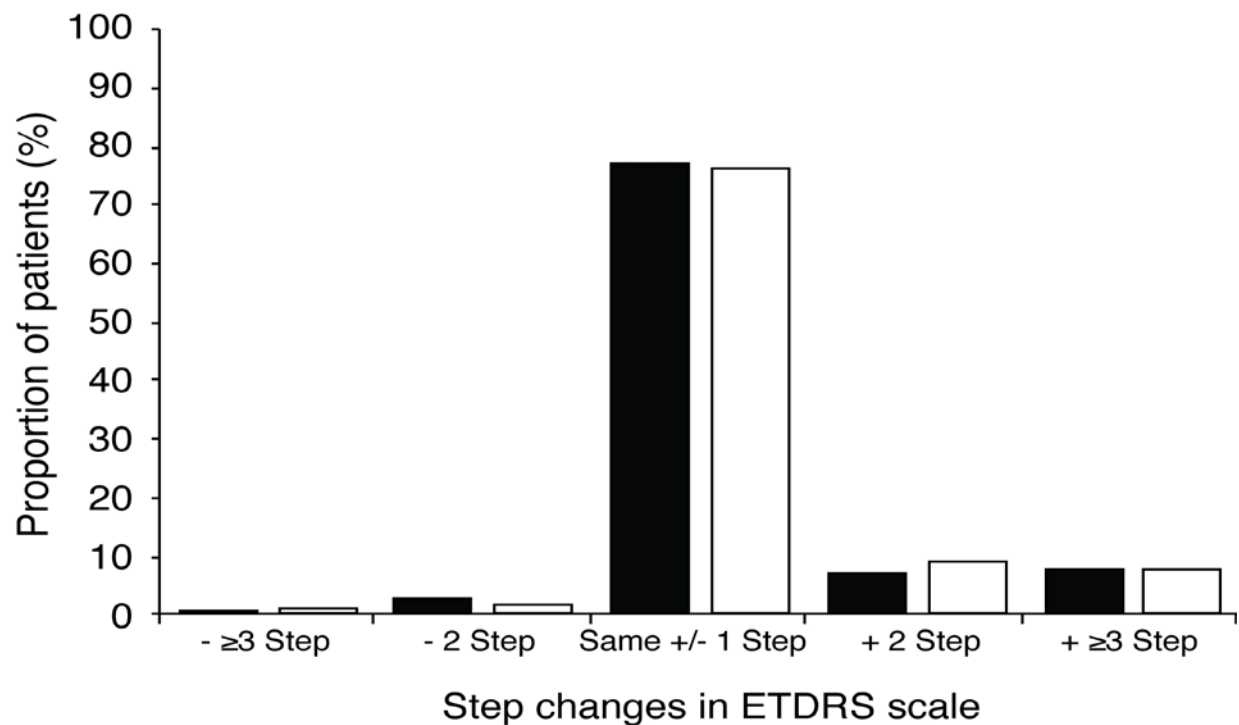

**ESM Fig. 1** Distribution of ETDRS scale changes at study endpoint (**a**) and at 2 years of treatment (**b**) for twice-daily NPH insulin (black bars) and once-daily insulin glargine (white bars). Percentage of patients calculated using the number of participants in the PP population as the denominator
