# Supplementary material for: Similar progression of diabetic retinopathy with insulin glargine and neutral protamine Hagedorn (NPH) insulin in patients with type 2 diabetes: a long-term, randomised, open-label study
Source: Springer Nature journal article supplement (doi:10.1007/s00125-009-1415-7), 2009-06-12
Supplement: MOESM4 [file 8088500]

## Electronic supplementary material

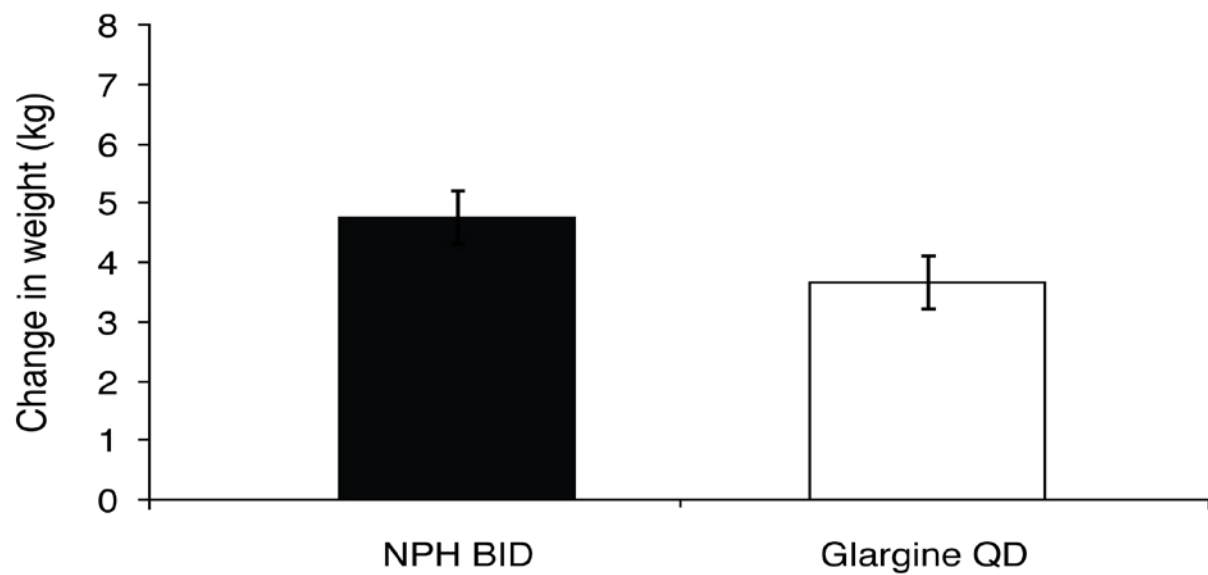

**ESM Fig. 2** Change in weight (LS mean  $\pm$  SEM) from baseline to endpoint (ITT population).

There were 500 and 503 patients with evaluable weight data in the NPH insulin and insulin glargine groups, respectively. The difference in progression rate between treatment groups was  $-1.2$  (95% CI  $-2.34, 0.00$ ). BID, twice daily; QD, once daily
